# Supplementary material for: Transcriptome and Metabolome Analyses of the Flowers and Leaves of Chrysanthemum dichrum
Source: Frontiers journal article supplement (doi:10.3389/fgene.2021.716163), 2021-08-31
Supplement: Table_9.XLS [file Table_9.XLS]

## Sheet: YS-2-VS-YS-3.up-regulated
KEGG_A_class	KEGG_B_class	Pathway	flower buds VS blooming flowers（YS-2-VS-YS-3 (616)）	All (9016)	Pvalue	Qvalue	Pathway ID	Genes	K_IDs
Metabolism	Biosynthesis of other secondary metabolites	Phenylpropanoid biosynthesis	42	211	1.91142e-10	2.21724e-08	ko00940	Unigene0002016;Unigene0005630;Unigene0005970;Unigene0006580;Unigene0007191;Unigene0008928;Unigene0009635;Unigene0013552;Unigene0013729;Unigene0014440;Unigene0014990;Unigene0014991;Unigene0018735;Unigene0020035;Unigene0025184;Unigene0025430;Unigene0027337;Unigene0028052;Unigene0028065;Unigene0029035;Unigene0029654;Unigene0031302;Unigene0032876;Unigene0034262;Unigene0035576;Unigene0040039;Unigene00…	K13065+K13065+K01188+K18368+K12356+K18368+K06892+K00430+K00083+K06892+K00430+K00430+K00430+K22395+K22395+K00430+K00083+K00083+K00588+K00430+K13065+K00083+K22395+K00430+K00430+K01188+K00588+K00430+K09753+K01188+K06892+K00430+K00430+K05350+K00430+K00430+K00430+K00430+K00430+K00430+K22395+K00430
Environmental Information Processing	Signal transduction	Plant hormone signal transduction	59	413	3.39319e-08	1.96805e-06	ko04075	Unigene0000995;Unigene0001922;Unigene0002034;Unigene0007085;Unigene0008371;Unigene0008599;Unigene0009796;Unigene0009856;Unigene0010114;Unigene0011043;Unigene0012226;Unigene0012849;Unigene0012850;Unigene0017482;Unigene0019676;Unigene0019777;Unigene0021116;Unigene0023426;Unigene0023615;Unigene0023934;Unigene0025071;Unigene0025343;Unigene0025942;Unigene0026723;Unigene0027787;Unigene0028247;Unigene00…	K14488+K13946+K14497+K14497+K14504+K14488+K14488+K14431+K14488+K14490+K13449+K14432+K14432+K14488+K14431+K14492+K14504+K14432+K14497+K14488+K14495+K14431+K14494+K14495+K14490+K14486+K14484+K13413+K14488+K14487+K14493+K14500+K14431+K14484+K14500+K14484+K14497+K14488+K14500+K14484+K14493+K14515+K14497+K14498+K14498+K13463+K14497+K14489+K14506+K13463+K13416+K13422+K14497+K13946+K14488+K14488+K14506+…
Metabolism	Global and overview maps	Biosynthesis of secondary metabolites	170	1917	6.56126e-05	0.00253702	ko01110	Unigene0001307;Unigene0002010;Unigene0002016;Unigene0002187;Unigene0003472;Unigene0004106;Unigene0005630;Unigene0005769;Unigene0005970;Unigene0006580;Unigene0007115;Unigene0008292;Unigene0008928;Unigene0009400;Unigene0009635;Unigene0009706;Unigene0010042;Unigene0010084;Unigene0010538;Unigene0012956;Unigene0013415;Unigene0013552;Unigene0013729;Unigene0014186;Unigene0014440;Unigene0014990;Unigene00…	K01115+K15397+K13065+K15095+K21026+K00002+K13065+K09833+K01188+K18368+K00232+K10760+K18368+K09834+K06892+K12153+K21374+K00002+K01689+K04125+K15397+K00430+K00083+K01689+K06892+K00430+K00430+K00430+K21374+K05280+K22395+K00895+K08081+K17912+K13493+K21371+K15397+K09840+K04122+K22395+K14454+K00430+K00382+K20561+K05282+K00422+K00083+K03841+K00547+K00083+K00588+K21374+K01895+K00815+K01593+K00430+K13065+…
Metabolism	Metabolism of terpenoids and polyketides	Zeatin biosynthesis	9	33	0.000266714	0.00773472	ko00908	Unigene0007533;Unigene0008206;Unigene0008292;Unigene0013100;Unigene0021937;Unigene0036781;Unigene0050413;Unigene0065062;Unigene0066906	K13495+K00279+K10760+K00279+K13493+K13495+K00279+K13495+K13495
Environmental Information Processing	Signal transduction	MAPK signaling pathway - plant	29	230	0.000956398	0.0221884	ko04016	Unigene0002034;Unigene0007085;Unigene0012226;Unigene0012389;Unigene0019871;Unigene0020494;Unigene0022779;Unigene0023615;Unigene0025675;Unigene0028752;Unigene0034646;Unigene0037163;Unigene0037465;Unigene0038229;Unigene0039983;Unigene0039984;Unigene0040137;Unigene0041196;Unigene0041343;Unigene0043262;Unigene0043926;Unigene0048952;Unigene0058001;Unigene0059383;Unigene0060627;Unigene0060720;Unigene00…	K14497+K14497+K13449+K02183+K02183+K02183+K13424+K14497+K02183+K13413+K14497+K20537+K13424+K13447+K20716+K20716+K14515+K13424+K14497+K14498+K14498+K14497+K20547+K13416+K13422+K14497+K02183+K20772+K14497
Metabolism	Lipid metabolism	Biosynthesis of unsaturated fatty acids	12	69	0.00224166	0.0433387	ko01040	Unigene0007115;Unigene0031598;Unigene0031599;Unigene0031789;Unigene0034799;Unigene0034800;Unigene0035583;Unigene0035584;Unigene0057777;Unigene0064497;Unigene0068543;Unigene0076790	K00232+K10256+K10256+K00232+K00059+K00059+K10256+K10256+K10256+K00507+K00507+K10256
Organismal Systems	Environmental adaptation	Plant-pathogen interaction	51	504	0.00276505	0.0458209	ko04626	Unigene0001257;Unigene0002010;Unigene0005012;Unigene0005068;Unigene0007164;Unigene0009676;Unigene0010031;Unigene0011285;Unigene0011652;Unigene0012104;Unigene0012226;Unigene0012389;Unigene0013215;Unigene0013415;Unigene0013907;Unigene0019871;Unigene0020201;Unigene0020494;Unigene0020730;Unigene0021009;Unigene0022779;Unigene0024381;Unigene0025191;Unigene0025675;Unigene0028752;Unigene0029012;Unigene00…	K13448+K15397+K09422+K13412+K13448+K09422+K01373+K13448+K13448+K13459+K13449+K02183+K01373+K15397+K04079+K02183+K09422+K02183+K13412+K09422+K13424+K15397+K09422+K02183+K13413+K09422+K18875+K09422+K09422+K18875+K09422+K09422+K09422+K09422+K13424+K13447+K09422+K13424+K13456+K09422+K09422+K09422+K05391+K13416+K02183+K13412+K04079+K09422+K09422+K09422+K13448
Metabolism	Biosynthesis of other secondary metabolites	Isoquinoline alkaloid biosynthesis	8	39	0.00420986	0.0610429	ko00950	Unigene0025311;Unigene0025782;Unigene0028436;Unigene0028478;Unigene0034786;Unigene0041928;Unigene0042073;Unigene0053038	K14454+K00422+K00815+K01593+K00815+K00815+K00276+K00422
Metabolism	Biosynthesis of other secondary metabolites	Flavonoid biosynthesis	10	61	0.00780475	0.100595	ko00941	Unigene0002016;Unigene0005630;Unigene0019491;Unigene0028065;Unigene0029654;Unigene0032502;Unigene0032503;Unigene0038519;Unigene0040257;Unigene0061971	K13065+K13065+K05280+K00588+K13065+K01859+K01859+K13082+K00588+K00660
Metabolism	Biosynthesis of other secondary metabolites	Stilbenoid, diarylheptanoid and gingerol biosynthesis	8	46	0.0117303	0.136072	ko00945	Unigene0002016;Unigene0005630;Unigene0009667;Unigene0028065;Unigene0029654;Unigene0040257;Unigene0041591;Unigene0041592	K13065+K13065+K16040+K00588+K13065+K00588+K16040+K16040
Metabolism	Metabolism of terpenoids and polyketides	Brassinosteroid biosynthesis	5	22	0.0145693	0.15364	ko00905	Unigene0037383;Unigene0039542;Unigene0049647;Unigene0068854;Unigene0074240	K12638+K20623+K20623+K15639+K20623
Metabolism	Biosynthesis of other secondary metabolites	Tropane, piperidine and pyridine alkaloid biosynthesis	6	32	0.0195491	0.188974	ko00960	Unigene0020858;Unigene0025311;Unigene0028436;Unigene0034786;Unigene0041928;Unigene0042073	K08081+K14454+K00815+K00815+K00815+K00276
Metabolism	Metabolism of terpenoids and polyketides	Sesquiterpenoid and triterpenoid biosynthesis	6	35	0.0294722	0.254448	ko00909	Unigene0001078;Unigene0025527;Unigene0039364;Unigene0047851;Unigene0076034;Unigene0076035	K15803+K20561+K15803+K00801+K15803+K15803
Metabolism	Carbohydrate metabolism	Starch and sucrose metabolism	23	224	0.0322279	0.254448	ko00500	Unigene0005970;Unigene0008201;Unigene0009962;Unigene0018211;Unigene0024985;Unigene0028577;Unigene0030309;Unigene0030375;Unigene0038050;Unigene0040039;Unigene0041346;Unigene0041416;Unigene0042532;Unigene0046161;Unigene0046163;Unigene0046164;Unigene0048075;Unigene0049485;Unigene0051255;Unigene0051894;Unigene0054653;Unigene0064656;Unigene0068079	K01188+K01176+K19893+K01087+K01178+K19893+K01176+K01087+K00695+K01188+K00844+K01188+K01193+K01193+K01193+K01193+K01835+K05350+K00700+K00975+K01193+K01810+K01810
Metabolism	Global and overview maps	Metabolic pathways	260	3485	0.0337792	0.254448	ko01100	Unigene0000845;Unigene0000869;Unigene0001307;Unigene0001468;Unigene0002010;Unigene0002016;Unigene0003825;Unigene0004106;Unigene0004502;Unigene0004531;Unigene0005630;Unigene0005769;Unigene0005970;Unigene0006370;Unigene0006580;Unigene0006940;Unigene0006964;Unigene0007115;Unigene0007139;Unigene0007354;Unigene0008201;Unigene0008292;Unigene0008928;Unigene0009036;Unigene0009205;Unigene0009400;Unigene00…	K02256+K03010+K01115+K02128+K15397+K13065+K03006+K00002+K05857+K02126+K13065+K09833+K01188+K01602+K18368+K01602+K11816+K00232+K02110+K03006+K01176+K10760+K18368+K22133+K03006+K09834+K21374+K00002+K00108+K01689+K15397+K01183+K00430+K00083+K01689+K02535+K00430+K00430+K07408+K01087+K00430+K21374+K05280+K22395+K00895+K04718+K08081+K07425+K02328+K03040+K00512+K15397+K09840+K04122+K01178+K08901+K22395+…
Metabolism	Metabolism of terpenoids and polyketides	Carotenoid biosynthesis	7	46	0.0350963	0.254448	ko00906	Unigene0006056;Unigene0021601;Unigene0024522;Unigene0041500;Unigene0053614;Unigene0075546;Unigene0075547	K14593+K17912+K09840+K09840+K09840+K09843+K09843
Metabolism	Amino acid metabolism	Tyrosine metabolism	10	79	0.0418314	0.285438	ko00350	Unigene0025311;Unigene0025782;Unigene0028436;Unigene0028478;Unigene0032228;Unigene0034786;Unigene0038016;Unigene0041928;Unigene0042073;Unigene0053038	K14454+K00422+K00815+K01593+K00457+K00815+K01800+K00815+K00276+K00422
Environmental Information Processing	Membrane transport	ABC transporters	9	72	0.0554919	0.354103	ko02010	Unigene0004491;Unigene0006255;Unigene0021873;Unigene0021874;Unigene0021875;Unigene0034377;Unigene0053906;Unigene0056681;Unigene0074859	K05666+K05658+K05666+K05666+K05666+K05666+K05658+K05658+K05666
Metabolism	Metabolism of terpenoids and polyketides	Diterpenoid biosynthesis	6	41	0.0579997	0.354103	ko00904	Unigene0012956;Unigene0024684;Unigene0025540;Unigene0036176;Unigene0048740;Unigene0049038	K04125+K04122+K05282+K04124+K17961+K04120
Metabolism	Glycan biosynthesis and metabolism	Other types of O-glycan biosynthesis	4	23	0.0677856	0.360248	ko00514	Unigene0026287;Unigene0033749;Unigene0034408;Unigene0037612	K18134+K18134+K13667+K18134
Metabolism	Biosynthesis of other secondary metabolites	Indole alkaloid biosynthesis	4	23	0.0677856	0.360248	ko00901	Unigene0003472;Unigene0028478;Unigene0042393;Unigene0051540	K21026+K01593+K21026+K21026
Metabolism	Biosynthesis of other secondary metabolites	Anthocyanin biosynthesis	1	1	0.068323	0.360248	ko00942	Unigene0006904	K12933
Metabolism	Amino acid metabolism	Valine, leucine and isoleucine biosynthesis	4	24	0.0771403	0.376051	ko00290	Unigene0048891;Unigene0048894;Unigene0048895;Unigene0049759	K01754+K01754+K01754+K00053
Metabolism	Biosynthesis of other secondary metabolites	Betalain biosynthesis	2	7	0.0778038	0.376051	ko00965	Unigene0028478;Unigene0031510	K01593+K15777
Metabolism	Amino acid metabolism	Phenylalanine metabolism	9	78	0.0833993	0.386973	ko00360	Unigene0025311;Unigene0028065;Unigene0028436;Unigene0028478;Unigene0032228;Unigene0034786;Unigene0040257;Unigene0041928;Unigene0042073	K14454+K00588+K00815+K01593+K00457+K00815+K00588+K00815+K00276
Metabolism	Global and overview maps	Fatty acid metabolism	16	163	0.0904707	0.403638	ko01212	Unigene0007115;Unigene0026672;Unigene0031598;Unigene0031599;Unigene0031789;Unigene0034799;Unigene0034800;Unigene0035583;Unigene0035584;Unigene0037415;Unigene0048354;Unigene0057777;Unigene0060776;Unigene0064497;Unigene0068543;Unigene0076790	K00232+K00648+K10256+K10256+K00232+K00059+K00059+K10256+K10256+K09458+K10527+K10256+K10527+K00507+K00507+K10256
Metabolism	Carbohydrate metabolism	Galactose metabolism	9	80	0.0942864	0.405082	ko00052	Unigene0031671;Unigene0041346;Unigene0042532;Unigene0046161;Unigene0046163;Unigene0046164;Unigene0047561;Unigene0048075;Unigene0054653	K06617+K00844+K01193+K01193+K01193+K01193+K01784+K01835+K01193
Metabolism	Amino acid metabolism	Phenylalanine, tyrosine and tryptophan biosynthesis	10	93	0.101703	0.421341	ko00400	Unigene0025311;Unigene0028436;Unigene0034786;Unigene0035516;Unigene0041928;Unigene0043895;Unigene0044265;Unigene0046672;Unigene0048136;Unigene0049764	K14454+K00815+K00815+K00800+K00815+K01696+K01696+K05359+K01626+K01626
Metabolism	Metabolism of cofactors and vitamins	Ubiquinone and other terpenoid-quinone biosynthesis	7	59	0.10578	0.42312	ko00130	Unigene0005769;Unigene0009400;Unigene0028436;Unigene0032228;Unigene0034786;Unigene0041928;Unigene0052336	K09833+K09834+K00815+K00457+K00815+K00815+K09833
Metabolism	Energy metabolism	Nitrogen metabolism	7	60	0.113125	0.437417	ko00910	Unigene0008283;Unigene0029213;Unigene0033782;Unigene0036436;Unigene0042515;Unigene0057894;Unigene0071311	K01673+K01725+K01455+K01674+K10534+K01915+K01915
Genetic Information Processing	Folding, sorting and degradation	Protein processing in endoplasmic reticulum	37	461	0.170725	0.638842	ko04141	Unigene0001214;Unigene0001892;Unigene0002799;Unigene0006014;Unigene0008175;Unigene0008531;Unigene0008568;Unigene0010130;Unigene0013735;Unigene0013907;Unigene0015200;Unigene0017338;Unigene0019089;Unigene0027057;Unigene0028614;Unigene0030185;Unigene0030988;Unigene0031974;Unigene0034501;Unigene0041802;Unigene0041803;Unigene0041804;Unigene0050084;Unigene0050085;Unigene0053053;Unigene0055149;Unigene00…	K03283+K03283+K10666+K03283+K13993+K03283+K03283+K13993+K13993+K04079+K09490+K03283+K13993+K03283+K13993+K13993+K03283+K13989+K03094+K03283+K03283+K03283+K13993+K13993+K13525+K13993+K13993+K13993+K13993+K13993+K03283+K08852+K03283+K03283+K13993+K04079+K06689
Metabolism	Carbohydrate metabolism	Glycolysis / Gluconeogenesis	23	275	0.181933	0.653741	ko00010	Unigene0004106;Unigene0010084;Unigene0010538;Unigene0014186;Unigene0020540;Unigene0025450;Unigene0027409;Unigene0028094;Unigene0033630;Unigene0034830;Unigene0041346;Unigene0044192;Unigene0045253;Unigene0048075;Unigene0051818;Unigene0054362;Unigene0054363;Unigene0062146;Unigene0064350;Unigene0064656;Unigene0066177;Unigene0068079;Unigene0074425	K00002+K00002+K01689+K01689+K00895+K00382+K03841+K01895+K03841+K01792+K00844+K00873+K01792+K01835+K00873+K01568+K01568+K00627+K00134+K01810+K00016+K01810+K15633
Metabolism	Glycan biosynthesis and metabolism	Mannose type O-glycan biosyntheis	1	3	0.191303	0.653741	ko00515	Unigene0026179	K18207
Genetic Information Processing	Transcription	RNA polymerase	9	94	0.191614	0.653741	ko03020	Unigene0000869;Unigene0003825;Unigene0007354;Unigene0009205;Unigene0022407;Unigene0030827;Unigene0035296;Unigene0041401;Unigene0058774	K03010+K03006+K03006+K03006+K03040+K03006+K03006+K03006+K03006
Metabolism	Amino acid metabolism	Glycine, serine and threonine metabolism	12	136	0.218423	0.723917	ko00260	Unigene0010088;Unigene0025450;Unigene0040315;Unigene0042073;Unigene0043895;Unigene0044265;Unigene0048891;Unigene0048894;Unigene0048895;Unigene0055175;Unigene0070913;Unigene0074425	K00108+K00382+K00827+K00276+K01696+K01696+K01754+K01754+K01754+K00108+K15893+K15633
Metabolism	Lipid metabolism	Cutin, suberine and wax biosynthesis	4	38	0.259698	0.836804	ko00073	Unigene0031651;Unigene0043114;Unigene0064835;Unigene0066428	K17991+K13356+K15400+K17991
Metabolism	Biosynthesis of other secondary metabolites	Flavone and flavonol biosynthesis	1	5	0.298074	0.912035	ko00944	Unigene0019491	K05280
Metabolism	Glycan biosynthesis and metabolism	Glycosaminoglycan degradation	3	28	0.29877	0.912035	ko00531	Unigene0041132;Unigene0043585;Unigene0048102	K10532+K10532+K07964
Metabolism	Lipid metabolism	Fatty acid elongation	6	67	0.307363	0.914207	ko00062	Unigene0002010;Unigene0013415;Unigene0024381;Unigene0026512;Unigene0027605;Unigene0058146	K15397+K15397+K15397+K01076+K01076+K01076
Metabolism	Metabolism of terpenoids and polyketides	Monoterpenoid biosynthesis	4	42	0.322319	0.934724	ko00902	Unigene0002187;Unigene0044452;Unigene0075983;Unigene0075984	K15095+K15095+K07385+K07385
Metabolism	Metabolism of other amino acids	Cyanoamino acid metabolism	7	83	0.338724	0.955195	ko00460	Unigene0005970;Unigene0009706;Unigene0033782;Unigene0040039;Unigene0041416;Unigene0044562;Unigene0049485	K01188+K12153+K01455+K01188+K01188+K18592+K05350
Metabolism	Metabolism of other amino acids	Taurine and hypotaurine metabolism	2	18	0.35103	0.955195	ko00430	Unigene0044562;Unigene0047544	K18592+K01580
Metabolism	Lipid metabolism	Sphingolipid metabolism	4	44	0.354081	0.955195	ko00600	Unigene0020776;Unigene0037842;Unigene0039564;Unigene0048709	K04718+K01634+K12349+K04711
Metabolism	Carbohydrate metabolism	Propanoate metabolism	5	59	0.377342	0.994811	ko00640	Unigene0025450;Unigene0028094;Unigene0066177;Unigene0069723;Unigene0072190	K00382+K01895+K00016+K18369+K18369
Metabolism	Carbohydrate metabolism	Amino sugar and nucleotide sugar metabolism	14	187	0.401105	0.999961	ko00520	Unigene0013424;Unigene0023926;Unigene0034283;Unigene0036670;Unigene0038452;Unigene0041346;Unigene0047561;Unigene0048075;Unigene0051894;Unigene0058001;Unigene0060083;Unigene0064656;Unigene0068079;Unigene0074717	K01183+K12451+K01183+K08678+K15920+K00844+K01784+K01835+K00975+K20547+K01183+K01810+K01810+K08678
Metabolism	Metabolism of cofactors and vitamins	Porphyrin and chlorophyll metabolism	7	89	0.407074	0.999961	ko00860	Unigene0029891;Unigene0033390;Unigene0037456;Unigene0037457;Unigene0037898;Unigene0048992;Unigene0048994	K13600+K22013+K08099+K08099+K13606+K13071+K13071
Metabolism	Energy metabolism	Photosynthesis	8	104	0.417552	0.999961	ko00195	Unigene0007139;Unigene0025015;Unigene0025785;Unigene0025787;Unigene0032753;Unigene0033563;Unigene0042451;Unigene0070653	K02110+K08901+K02111+K02109+K02641+K02705+K02690+K02634
Genetic Information Processing	Folding, sorting and degradation	SNARE interactions in vesicular transport	5	62	0.418859	0.999961	ko04130	Unigene0016776;Unigene0032026;Unigene0032434;Unigene0037010;Unigene0039432	K08488+K08486+K08486+K08488+K08507
Metabolism	Metabolism of cofactors and vitamins	Nicotinate and nicotinamide metabolism	3	37	0.468338	0.999961	ko00760	Unigene0033291;Unigene0040910;Unigene0052168	K18551+K01950+K00858
Metabolism	Metabolism of cofactors and vitamins	Biotin metabolism	3	40	0.521082	0.999961	ko00780	Unigene0034799;Unigene0034800;Unigene0037415	K00059+K00059+K09458
Metabolism	Carbohydrate metabolism	Pentose phosphate pathway	8	114	0.521873	0.999961	ko00030	Unigene0020540;Unigene0027409;Unigene0033630;Unigene0048075;Unigene0053237;Unigene0053238;Unigene0064656;Unigene0068079	K00895+K03841+K03841+K01835+K01057+K01057+K01810+K01810
Metabolism	Lipid metabolism	Arachidonic acid metabolism	3	41	0.538022	0.999961	ko00590	Unigene0020905;Unigene0034317;Unigene0044562	K07425+K05309+K18592
Metabolism	Lipid metabolism	alpha-Linolenic acid metabolism	5	71	0.539	0.999961	ko00592	Unigene0007115;Unigene0031789;Unigene0048354;Unigene0059927;Unigene0060776	K00232+K00232+K10527+K00454+K10527
Metabolism	Amino acid metabolism	Alanine, aspartate and glutamate metabolism	6	86	0.539916	0.999961	ko00250	Unigene0025311;Unigene0040315;Unigene0044804;Unigene0047544;Unigene0057894;Unigene0071311	K14454+K00827+K17761+K01580+K01915+K01915
Metabolism	Carbohydrate metabolism	Fructose and mannose metabolism	7	102	0.551599	0.999961	ko00051	Unigene0018832;Unigene0020540;Unigene0027409;Unigene0030250;Unigene0033630;Unigene0041346;Unigene0072040	K19355+K00895+K03841+K19355+K03841+K00844+K00008
Metabolism	Carbohydrate metabolism	Glyoxylate and dicarboxylate metabolism	11	164	0.570623	0.999961	ko00630	Unigene0006370;Unigene0006940;Unigene0009036;Unigene0025450;Unigene0028094;Unigene0033782;Unigene0057894;Unigene0069116;Unigene0070913;Unigene0071311;Unigene0075271	K01602+K01602+K22133+K00382+K01895+K01455+K01915+K01647+K15893+K01915+K01647
Metabolism	Energy metabolism	Oxidative phosphorylation	19	285	0.579635	0.999961	ko00190	Unigene0000845;Unigene0001468;Unigene0004531;Unigene0007139;Unigene0007424;Unigene0025785;Unigene0025787;Unigene0028689;Unigene0042719;Unigene0044379;Unigene0044380;Unigene0049605;Unigene0057325;Unigene0062411;Unigene0064007;Unigene0064479;Unigene0065324;Unigene0070010;Unigene0073456	K02256+K02128+K02126+K02110+K01535+K02111+K02109+K02150+K03879+K03881+K03881+K00412+K01507+K02128+K05577+K02265+K01507+K02256+K02128
Metabolism	Biosynthesis of other secondary metabolites	Glucosinolate biosynthesis	1	13	0.601733	0.999961	ko00966	Unigene0009706	K12153
Genetic Information Processing	Folding, sorting and degradation	Sulfur relay system	1	13	0.601733	0.999961	ko04122	Unigene0029169	K04487
Metabolism	Carbohydrate metabolism	Butanoate metabolism	2	30	0.617524	0.999961	ko00650	Unigene0044804;Unigene0047544	K17761+K01580
Metabolism	Metabolism of cofactors and vitamins	Riboflavin metabolism	2	30	0.617524	0.999961	ko00740	Unigene0032965;Unigene0035302	K14379+K14652
Environmental Information Processing	Signal transduction	Phosphatidylinositol signaling system	8	127	0.645893	0.999961	ko04070	Unigene0004502;Unigene0012389;Unigene0019871;Unigene0020494;Unigene0025675;Unigene0027490;Unigene0046980;Unigene0063010	K05857+K02183+K02183+K02183+K02183+K00889+K00913+K02183
Metabolism	Metabolism of cofactors and vitamins	Folate biosynthesis	2	33	0.669564	0.999961	ko00790	Unigene0027730;Unigene0035302	K18482+K14652
Cellular Processes	Transport and catabolism	Endocytosis	23	362	0.674559	0.999961	ko04144	Unigene0001201;Unigene0001214;Unigene0001307;Unigene0001892;Unigene0006014;Unigene0008531;Unigene0008568;Unigene0013430;Unigene0015823;Unigene0017338;Unigene0021632;Unigene0022169;Unigene0027057;Unigene0027490;Unigene0030988;Unigene0037651;Unigene0041802;Unigene0041803;Unigene0041804;Unigene0057933;Unigene0060647;Unigene0060648;Unigene0070899	K07937+K03283+K01115+K03283+K03283+K03283+K03283+K07897+K19476+K03283+K07897+K11247+K03283+K00889+K03283+K12471+K03283+K03283+K03283+K03283+K03283+K03283+K12471
Metabolism	Amino acid metabolism	Tryptophan metabolism	4	68	0.692064	0.999961	ko00380	Unigene0006964;Unigene0017129;Unigene0028478;Unigene0063600	K11816+K07408+K01593+K11816
Metabolism	Global and overview maps	Biosynthesis of amino acids	28	444	0.701641	0.999961	ko01230	Unigene0010538;Unigene0014186;Unigene0025311;Unigene0028436;Unigene0033073;Unigene0034786;Unigene0035516;Unigene0039445;Unigene0041928;Unigene0043895;Unigene0044192;Unigene0044265;Unigene0046672;Unigene0048136;Unigene0048189;Unigene0048891;Unigene0048894;Unigene0048895;Unigene0049759;Unigene0049764;Unigene0051818;Unigene0052983;Unigene0057894;Unigene0064350;Unigene0069116;Unigene0071311;Unigene00…	K01689+K01689+K14454+K00815+K00640+K00815+K00800+K00640+K00815+K01696+K00873+K01696+K05359+K01626+K12657+K01754+K01754+K01754+K00053+K01626+K00873+K12657+K01915+K00134+K01647+K01915+K15633+K01647
Metabolism	Amino acid metabolism	Cysteine and methionine metabolism	10	168	0.720037	0.999961	ko00270	Unigene0025311;Unigene0027454;Unigene0028436;Unigene0033073;Unigene0034786;Unigene0039445;Unigene0040315;Unigene0041928;Unigene0066177;Unigene0068779	K14454+K00547+K00815+K00640+K00815+K00640+K00827+K00815+K00016+K20772
Genetic Information Processing	Replication and repair	Base excision repair	4	73	0.744247	0.999961	ko03410	Unigene0021271;Unigene0021350;Unigene0023913;Unigene0034353	K03648+K02328+K10802+K01246
Metabolism	Amino acid metabolism	Arginine biosynthesis	3	56	0.746448	0.999961	ko00220	Unigene0025311;Unigene0057894;Unigene0071311	K14454+K01915+K01915
Metabolism	Metabolism of cofactors and vitamins	Thiamine metabolism	2	42	0.791858	0.999961	ko00730	Unigene0029169;Unigene0038296	K04487+K03146
Organismal Systems	Environmental adaptation	Circadian rhythm - plant	3	62	0.805639	0.999961	ko04712	Unigene0029858;Unigene0036578;Unigene0061971	K12116+K12127+K00660
Metabolism	Global and overview maps	2-Oxocarboxylic acid metabolism	5	99	0.815654	0.999961	ko01210	Unigene0009706;Unigene0025311;Unigene0049759;Unigene0069116;Unigene0075271	K12153+K14454+K00053+K01647+K01647
Metabolism	Lipid metabolism	Steroid biosynthesis	2	45	0.822723	0.999961	ko00100	Unigene0047851;Unigene0053637	K00801+K09828
Cellular Processes	Transport and catabolism	Autophagy - other eukaryotes	4	83	0.82798	0.999961	ko04136	Unigene0034077;Unigene0034078;Unigene0069950;Unigene0071330	K08341+K08341+K07203+K08341
Metabolism	Energy metabolism	Sulfur metabolism	2	47	0.840953	0.999961	ko00920	Unigene0033073;Unigene0039445	K00640+K00640
Metabolism	Carbohydrate metabolism	Ascorbate and aldarate metabolism	4	88	0.860496	0.999961	ko00053	Unigene0035577;Unigene0040225;Unigene0041723;Unigene0048294	K00423+K14190+K19642+K19642
Metabolism	Nucleotide metabolism	Pyrimidine metabolism	11	214	0.873781	0.999961	ko00240	Unigene0000869;Unigene0003825;Unigene0007354;Unigene0009205;Unigene0021350;Unigene0022407;Unigene0030827;Unigene0035296;Unigene0037160;Unigene0041401;Unigene0058774	K03010+K03006+K03006+K03006+K02328+K03040+K03006+K03006+K01489+K03006+K03006
Metabolism	Lipid metabolism	Fatty acid biosynthesis	4	91	0.877373	0.999961	ko00061	Unigene0026672;Unigene0034799;Unigene0034800;Unigene0037415	K00648+K00059+K00059+K09458
Metabolism	Energy metabolism	Carbon fixation in photosynthetic organisms	9	181	0.87884	0.999961	ko00710	Unigene0006370;Unigene0006940;Unigene0025311;Unigene0027409;Unigene0033630;Unigene0037000;Unigene0046334;Unigene0051101;Unigene0064350	K01602+K01602+K14454+K03841+K03841+K00051+K01595+K01595+K00134
Metabolism	Metabolism of other amino acids	beta-Alanine metabolism	3	73	0.884092	0.999961	ko00410	Unigene0025442;Unigene0042073;Unigene0047544	K12259+K00276+K01580
Metabolism	Carbohydrate metabolism	Pyruvate metabolism	10	200	0.885108	0.999961	ko00620	Unigene0025450;Unigene0028094;Unigene0037000;Unigene0040765;Unigene0044192;Unigene0046334;Unigene0051101;Unigene0051818;Unigene0062146;Unigene0066177	K00382+K01895+K00051+K00102+K00873+K01595+K01595+K00873+K00627+K00016
Metabolism	Nucleotide metabolism	Purine metabolism	15	286	0.888472	0.999961	ko00230	Unigene0000869;Unigene0003825;Unigene0007189;Unigene0007354;Unigene0009205;Unigene0021350;Unigene0022407;Unigene0023648;Unigene0030827;Unigene0035296;Unigene0041401;Unigene0044192;Unigene0048075;Unigene0051818;Unigene0058774	K03010+K03006+K02083+K03006+K03006+K02328+K03040+K02083+K03006+K03006+K03006+K00873+K01835+K00873+K03006
Metabolism	Lipid metabolism	Fatty acid degradation	5	112	0.888758	0.999961	ko00071	Unigene0007115;Unigene0020905;Unigene0031789;Unigene0048354;Unigene0060776	K00232+K07425+K00232+K10527+K10527
Metabolism	Glycan biosynthesis and metabolism	Other glycan degradation	1	32	0.896549	0.999961	ko00511	Unigene0002929	K01191
Metabolism	Carbohydrate metabolism	Inositol phosphate metabolism	5	115	0.901572	0.999961	ko00562	Unigene0004502;Unigene0027356;Unigene0027490;Unigene0046980;Unigene0069437	K05857+K01858+K00889+K00913+K01858
Metabolism	Metabolism of cofactors and vitamins	Pantothenate and CoA biosynthesis	1	34	0.91025	0.999961	ko00770	Unigene0049759	K00053
Genetic Information Processing	Transcription	Spliceosome	21	399	0.919279	0.999961	ko03040	Unigene0001214;Unigene0001892;Unigene0006014;Unigene0007690;Unigene0008531;Unigene0008568;Unigene0017338;Unigene0020139;Unigene0027057;Unigene0030773;Unigene0030988;Unigene0036573;Unigene0041802;Unigene0041803;Unigene0041804;Unigene0046571;Unigene0056298;Unigene0056301;Unigene0057933;Unigene0060647;Unigene0060648	K03283+K03283+K03283+K12815+K03283+K03283+K03283+K12890+K03283+K12854+K03283+K12854+K03283+K03283+K03283+K12813+K12845+K12845+K03283+K03283+K03283
Metabolism	Amino acid metabolism	Arginine and proline metabolism	4	102	0.924994	0.999961	ko00330	Unigene0025311;Unigene0025442;Unigene0048189;Unigene0052983	K14454+K12259+K12657+K12657
Metabolism	Lipid metabolism	Linoleic acid metabolism	1	37	0.92748	0.999961	ko00591	Unigene0059927	K00454
Metabolism	Global and overview maps	Carbon metabolism	31	570	0.929983	0.999961	ko01200	Unigene0006370;Unigene0006940;Unigene0010538;Unigene0014186;Unigene0025311;Unigene0025450;Unigene0027409;Unigene0028094;Unigene0033073;Unigene0033630;Unigene0033782;Unigene0037000;Unigene0039445;Unigene0041346;Unigene0044192;Unigene0046334;Unigene0048891;Unigene0048894;Unigene0048895;Unigene0051101;Unigene0051818;Unigene0053237;Unigene0053238;Unigene0062146;Unigene0064350;Unigene0064656;Unigene00…	K01602+K01602+K01689+K01689+K14454+K00382+K03841+K01895+K00640+K03841+K01455+K00051+K00640+K00844+K00873+K01595+K01754+K01754+K01754+K01595+K00873+K01057+K01057+K00627+K00134+K01810+K01810+K01647+K15893+K15633+K01647
Cellular Processes	Transport and catabolism	Peroxisome	7	161	0.93022	0.999961	ko04146	Unigene0007115;Unigene0007331;Unigene0031789;Unigene0039438;Unigene0039439;Unigene0043114;Unigene0071059	K00232+K13348+K00232+K12663+K12663+K13356+K04564
Genetic Information Processing	Transcription	Basal transcription factors	3	88	0.94547	0.999961	ko03022	Unigene0025392;Unigene0052718;Unigene0055789	K03133+K03122+K03120
Genetic Information Processing	Translation	Ribosome biogenesis in eukaryotes	7	168	0.946775	0.999961	ko03008	Unigene0027188;Unigene0043165;Unigene0051448;Unigene0052998;Unigene0056298;Unigene0056301;Unigene0061580	K03539+K14564+K07562+K14552+K12845+K12845+K03264
Metabolism	Carbohydrate metabolism	Pentose and glucuronate interconversions	5	134	0.956595	0.999961	ko00040	Unigene0004106;Unigene0010084;Unigene0062145;Unigene0068601;Unigene0072040	K00002+K00002+K01051+K01184+K00008
Metabolism	Energy metabolism	Photosynthesis - antenna proteins	1	51	0.973208	0.999961	ko00196	Unigene0070860	K08910
Cellular Processes	Transport and catabolism	Phagosome	7	187	0.975502	0.999961	ko04145	Unigene0013430;Unigene0016776;Unigene0017584;Unigene0021632;Unigene0028689;Unigene0037010;Unigene0076914	K07897+K08488+K07375+K07897+K02150+K08488+K07374
Metabolism	Metabolism of other amino acids	Glutathione metabolism	6	169	0.977612	0.999961	ko00480	Unigene0018366;Unigene0030509;Unigene0031804;Unigene0036688;Unigene0040988;Unigene0044562	K00799+K00799+K00799+K00799+K00799+K18592
Metabolism	Amino acid metabolism	Valine, leucine and isoleucine degradation	2	84	0.981612	0.999961	ko00280	Unigene0025450;Unigene0040315	K00382+K00827
Metabolism	Lipid metabolism	Ether lipid metabolism	1	67	0.991431	0.999961	ko00565	Unigene0001307	K01115
Metabolism	Lipid metabolism	Glycerolipid metabolism	3	123	0.99195	0.999961	ko00561	Unigene0004106;Unigene0010084;Unigene0026613	K00002+K00002+K22848
Genetic Information Processing	Translation	Aminoacyl-tRNA biosynthesis	7	213	0.992209	0.999961	ko00970	Unigene0004652;Unigene0011334;Unigene0041674;Unigene0047186;Unigene0054174;Unigene0057964;Unigene0057966	K01870+K01880+K01887+K01893+K01872+K01869+K01869
Metabolism	Amino acid metabolism	Lysine degradation	1	74	0.994799	0.999961	ko00310	Unigene0047696	K14157
Metabolism	Carbohydrate metabolism	Citrate cycle (TCA cycle)	4	155	0.994825	0.999961	ko00020	Unigene0025450;Unigene0062146;Unigene0069116;Unigene0075271	K00382+K00627+K01647+K01647
Genetic Information Processing	Translation	mRNA surveillance pathway	7	224	0.99532	0.999961	ko03015	Unigene0007629;Unigene0024197;Unigene0034710;Unigene0039082;Unigene0039083;Unigene0045295;Unigene0064408	K13126+K03265+K14397+K06269+K06269+K06269+K03265
Genetic Information Processing	Folding, sorting and degradation	Protein export	1	78	0.996091	0.999961	ko03060	Unigene0015200	K09490
Metabolism	Lipid metabolism	Glycerophospholipid metabolism	4	164	0.996832	0.999961	ko00564	Unigene0001307;Unigene0022715;Unigene0039323;Unigene0043541	K01115+K06130+K06130+K05929
Genetic Information Processing	Translation	RNA transport	11	322	0.997586	0.999961	ko03013	Unigene0002149;Unigene0007629;Unigene0007792;Unigene0027188;Unigene0036097;Unigene0039708;Unigene0050890;Unigene0051448;Unigene0058259;Unigene0070765;Unigene0073905	K14297+K13126+K03236+K03539+K03231+K03113+K03242+K07562+K03231+K03238+K12160
Genetic Information Processing	Folding, sorting and degradation	RNA degradation	5	202	0.998522	0.999961	ko03018	Unigene0007629;Unigene0010538;Unigene0014186;Unigene0029872;Unigene0049815	K13126+K01689+K01689+K12581+K12591
Genetic Information Processing	Translation	Ribosome	34	778	0.998981	0.999961	ko03010	Unigene0000991;Unigene0001042;Unigene0007145;Unigene0010937;Unigene0014554;Unigene0014555;Unigene0015918;Unigene0021455;Unigene0022966;Unigene0022981;Unigene0023859;Unigene0026850;Unigene0027751;Unigene0029832;Unigene0032362;Unigene0046325;Unigene0049552;Unigene0049553;Unigene0049554;Unigene0049555;Unigene0049556;Unigene0050077;Unigene0053134;Unigene0053679;Unigene0054499;Unigene0060406;Unigene00…	K02987+K02912+K02941+K02883+K02991+K02991+K02932+K02900+K02985+K02925+K02977+K02894+K02942+K02866+K02932+K02946+K02943+K02943+K02943+K02943+K02943+K02953+K02946+K02945+K02952+K02946+K02941+K02974+K02898+K02896+K02910+K02981+K02943+K02946
Genetic Information Processing	Replication and repair	Mismatch repair	2	132	0.999115	0.999961	ko03430	Unigene0000041;Unigene0021350	K07466+K02328
Metabolism	Metabolism of terpenoids and polyketides	Terpenoid backbone biosynthesis	1	101	0.999245	0.999961	ko00900	Unigene0044839	K15889
Genetic Information Processing	Folding, sorting and degradation	Proteasome	1	113	0.99968	0.999961	ko03050	Unigene0019379	K02728
Genetic Information Processing	Replication and repair	DNA replication	2	148	0.999689	0.999961	ko03030	Unigene0000041;Unigene0021350	K07466+K02328
Genetic Information Processing	Replication and repair	Homologous recombination	2	162	0.999876	0.999961	ko03440	Unigene0000041;Unigene0021350	K07466+K02328
Genetic Information Processing	Replication and repair	Nucleotide excision repair	2	163	0.999884	0.999961	ko03420	Unigene0000041;Unigene0021350	K07466+K02328
Genetic Information Processing	Folding, sorting and degradation	Ubiquitin mediated proteolysis	5	267	0.999961	0.999961	ko04120	Unigene0034501;Unigene0039504;Unigene0042775;Unigene0060827;Unigene0073067	K03094+K10144+K04706+K10581+K06689

## Sheet: YS-2-VS-YS-3.down-regulated
KEGG_A_class	KEGG_B_class	Pathway	flower buds VS blooming flowers（YS-2-VS-YS-3 (841)）	All (9016)	Pvalue	Qvalue	Pathway ID	Genes	K_IDs
Metabolism	Carbohydrate metabolism	Pentose and glucuronate interconversions	50	134	7.74178e-19	9.21272e-17	ko00040	Unigene0004140;Unigene0006303;Unigene0008351;Unigene0008655;Unigene0009358;Unigene0010573;Unigene0012341;Unigene0015001;Unigene0016121;Unigene0017709;Unigene0022421;Unigene0022422;Unigene0023289;Unigene0023647;Unigene0024936;Unigene0025276;Unigene0027806;Unigene0028033;Unigene0028246;Unigene0029857;Unigene0029909;Unigene0029910;Unigene0030685;Unigene0031153;Unigene0031154;Unigene0032699;Unigene00…	K01051+K01051+K01728+K01051+K00012+K01051+K01051+K01051+K12447+K01728+K01213+K01213+K01051+K01051+K01728+K01728+K01728+K01051+K01051+K01184+K01728+K01728+K01213+K01728+K01728+K01728+K01728+K01728+K01728+K01728+K01051+K01213+K01728+K01213+K16190+K01051+K01728+K01051+K01051+K01051+K01213+K01213+K01213+K01728+K01051+K01213+K01213+K01728+K01051+K01051
Metabolism	Global and overview maps	Metabolic pathways	389	3485	1.45459e-06	8.65479e-05	ko01100	Unigene0000055;Unigene0000256;Unigene0000264;Unigene0000628;Unigene0000784;Unigene0000911;Unigene0000982;Unigene0001165;Unigene0001263;Unigene0001295;Unigene0001329;Unigene0003427;Unigene0003576;Unigene0003842;Unigene0004072;Unigene0004140;Unigene0004219;Unigene0004222;Unigene0004586;Unigene0004985;Unigene0005111;Unigene0005193;Unigene0005617;Unigene0005756;Unigene0006007;Unigene0006043;Unigene00…	K03006+K01681+K01850+K01623+K12657+K00261+K20279+K01610+K01904+K14760+K00919+K02145+K01595+K00626+K00787+K01051+K01006+K01205+K01784+K01807+K01193+K10527+K01648+K01568+K01057+K00512+K20279+K01051+K00028+K00121+K05575+K01179+K01723+K01193+K01113+K00454+K05933+K00121+K01087+K08679+K00511+K11816+K00876+K01188+K12657+K02146+K01051+K14423+K13248+K00919+K00012+K09903+K13366+K00430+K01057+K00416+K01792+…
Metabolism	Lipid metabolism	Glycerophospholipid metabolism	33	164	1.60508e-05	0.00063668	ko00564	Unigene0013069;Unigene0013459;Unigene0013460;Unigene0022101;Unigene0022102;Unigene0022828;Unigene0023440;Unigene0031822;Unigene0031823;Unigene0035533;Unigene0036001;Unigene0036876;Unigene0037448;Unigene0038972;Unigene0039384;Unigene0041108;Unigene0045054;Unigene0045158;Unigene0045208;Unigene0045394;Unigene0045619;Unigene0045803;Unigene0045806;Unigene0048677;Unigene0049031;Unigene0049032;Unigene00…	K01115+K01115+K01115+K01115+K01115+K00999+K18693+K18696+K18696+K18696+K13510+K18693+K13510+K00981+K13508+K00901+K15728+K13508+K01115+K00006+K00901+K00995+K00995+K01613+K01115+K01115+K18693+K00901+K01115+K01115+K01115+K13519+K01115
Metabolism	Carbohydrate metabolism	Starch and sucrose metabolism	39	224	8.973e-05	0.00266947	ko00500	Unigene0002878;Unigene0005111;Unigene0006965;Unigene0007240;Unigene0007918;Unigene0008408;Unigene0014981;Unigene0015372;Unigene0019052;Unigene0020421;Unigene0025085;Unigene0025211;Unigene0025212;Unigene0025213;Unigene0026430;Unigene0026930;Unigene0027735;Unigene0028453;Unigene0030521;Unigene0035448;Unigene0035795;Unigene0038073;Unigene0040322;Unigene0042023;Unigene0042581;Unigene0043164;Unigene00…	K07024+K01193+K01179+K01193+K01087+K01188+K00847+K00695+K01087+K00695+K01193+K00695+K00695+K00695+K01193+K01179+K00975+K00844+K01179+K01179+K01193+K00696+K01193+K01513+K01193+K00844+K00847+K05350+K01193+K05350+K16055+K00696+K01188+K01188+K05349+K00847+K19891+K00975+K00695
Environmental Information Processing	Signal transduction	Phosphatidylinositol signaling system	24	127	0.000593057	0.0141148	ko04070	Unigene0000982;Unigene0006071;Unigene0011880;Unigene0015949;Unigene0015950;Unigene0022048;Unigene0022049;Unigene0022828;Unigene0024736;Unigene0025500;Unigene0025981;Unigene0035948;Unigene0038972;Unigene0041108;Unigene0042992;Unigene0045312;Unigene0045619;Unigene0046393;Unigene0046394;Unigene0046982;Unigene0046983;Unigene0049436;Unigene0050244;Unigene0051059	K20279+K20279+K01099+K00889+K00889+K18081+K18081+K00999+K00889+K00913+K00889+K13024+K00981+K00901+K01110+K00921+K00901+K21797+K21797+K00913+K05857+K21797+K00901+K00888
Genetic Information Processing	Replication and repair	Mismatch repair	24	132	0.00104963	0.0179196	ko03430	Unigene0001908;Unigene0002194;Unigene0004159;Unigene0004655;Unigene0006634;Unigene0008596;Unigene0009301;Unigene0024616;Unigene0032366;Unigene0032367;Unigene0035121;Unigene0036400;Unigene0036401;Unigene0049700;Unigene0050003;Unigene0050324;Unigene0053588;Unigene0055030;Unigene0057254;Unigene0057314;Unigene0060051;Unigene0060052;Unigene0067260;Unigene0069265	K07466+K07466+K07466+K07466+K07466+K07466+K07466+K07466+K07466+K07466+K07466+K07466+K07466+K08735+K07466+K07466+K07466+K07466+K07466+K07466+K07466+K07466+K07466+K07466
Metabolism	Lipid metabolism	Ether lipid metabolism	15	67	0.0010541	0.0179196	ko00565	Unigene0013069;Unigene0013459;Unigene0013460;Unigene0022101;Unigene0022102;Unigene0036001;Unigene0037448;Unigene0045208;Unigene0049031;Unigene0049032;Unigene0054721;Unigene0056372;Unigene0065007;Unigene0068482;Unigene0076193	K01115+K01115+K01115+K01115+K01115+K13510+K13510+K01115+K01115+K01115+K01115+K01115+K01115+K13519+K01115
Organismal Systems	Environmental adaptation	Plant-pathogen interaction	67	504	0.00165806	0.0236993	ko04626	Unigene0000440;Unigene0003777;Unigene0003778;Unigene0007051;Unigene0008183;Unigene0008320;Unigene0008835;Unigene0012377;Unigene0012681;Unigene0012705;Unigene0013336;Unigene0015408;Unigene0016401;Unigene0018656;Unigene0019022;Unigene0019907;Unigene0020050;Unigene0020817;Unigene0021364;Unigene0021446;Unigene0021902;Unigene0021971;Unigene0021972;Unigene0022138;Unigene0027288;Unigene0027354;Unigene00…	K09422+K13412+K13430+K13436+K13448+K13448+K09422+K09422+K13448+K15397+K15397+K13449+K13412+K13430+K09422+K13430+K13449+K13449+K09422+K09422+K09422+K15397+K15397+K13448+K13448+K13448+K15397+K13449+K13448+K13412+K13412+K13448+K09422+K01373+K13412+K13448+K15397+K13412+K13412+K13412+K13448+K09422+K15397+K09422+K15397+K15397+K15397+K09422+K05391+K05391+K05391+K04079+K13412+K13457+K13412+K09422+K13412+…
Metabolism	Lipid metabolism	Cutin, suberine and wax biosynthesis	10	38	0.00198281	0.0236993	ko00073	Unigene0004785;Unigene0004824;Unigene0023701;Unigene0027419;Unigene0030539;Unigene0033550;Unigene0038239;Unigene0041453;Unigene0041454;Unigene0045861	K15401+K13356+K15400+K15403+K15402+K17991+K15404+K15398+K15398+K17991
Metabolism	Carbohydrate metabolism	Inositol phosphate metabolism	21	115	0.00199154	0.0236993	ko00562	Unigene0000982;Unigene0006071;Unigene0011880;Unigene0015949;Unigene0015950;Unigene0017946;Unigene0022048;Unigene0022049;Unigene0022828;Unigene0024736;Unigene0025500;Unigene0025981;Unigene0027881;Unigene0042992;Unigene0045312;Unigene0046393;Unigene0046394;Unigene0046982;Unigene0046983;Unigene0049436;Unigene0051059	K20279+K20279+K01099+K00889+K00889+K01803+K18081+K18081+K00999+K00889+K00913+K00889+K01858+K01110+K00921+K21797+K21797+K00913+K05857+K21797+K00888
Cellular Processes	Transport and catabolism	Endocytosis	50	362	0.00288143	0.0311718	ko04144	Unigene0000832;Unigene0002673;Unigene0003602;Unigene0007107;Unigene0011847;Unigene0013069;Unigene0013459;Unigene0013460;Unigene0015949;Unigene0015950;Unigene0019736;Unigene0020949;Unigene0022101;Unigene0022102;Unigene0023138;Unigene0024736;Unigene0024767;Unigene0025981;Unigene0026035;Unigene0026655;Unigene0027478;Unigene0030819;Unigene0031231;Unigene0032137;Unigene0032960;Unigene0034585;Unigene00…	K03283+K03283+K01528+K10365+K07904+K01115+K01115+K01115+K00889+K00889+K07897+K07937+K01115+K01115+K07904+K00889+K07937+K00889+K07904+K07904+K07904+K05747+K12185+K03283+K12486+K04646+K12486+K05758+K12486+K01115+K12489+K11826+K01115+K01115+K12493+K01528+K18443+K03283+K03283+K03283+K01115+K12489+K01115+K03283+K07897+K01115+K12184+K01115+K19366+K03283
Metabolism	Lipid metabolism	Glycerolipid metabolism	21	123	0.00458396	0.0454576	ko00561	Unigene0021085;Unigene0021086;Unigene0023440;Unigene0023555;Unigene0028923;Unigene0030854;Unigene0033270;Unigene0036876;Unigene0039384;Unigene0041108;Unigene0045054;Unigene0045158;Unigene0045619;Unigene0045665;Unigene0049811;Unigene0050244;Unigene0055371;Unigene0055373;Unigene0055440;Unigene0058065;Unigene0068482	K03715+K03715+K18693+K00128+K00679+K01054+K01054+K18693+K13508+K00901+K15728+K13508+K00901+K03715+K18693+K00901+K00679+K00679+K11155+K22848+K13519
Genetic Information Processing	Replication and repair	DNA replication	24	148	0.00502666	0.0460133	ko03030	Unigene0001908;Unigene0002194;Unigene0004159;Unigene0004655;Unigene0006634;Unigene0008596;Unigene0009301;Unigene0024616;Unigene0032366;Unigene0032367;Unigene0035121;Unigene0036400;Unigene0036401;Unigene0046713;Unigene0050003;Unigene0050324;Unigene0053588;Unigene0055030;Unigene0057254;Unigene0057314;Unigene0060051;Unigene0060052;Unigene0067260;Unigene0069265	K07466+K07466+K07466+K07466+K07466+K07466+K07466+K07466+K07466+K07466+K07466+K07466+K07466+K04799+K07466+K07466+K07466+K07466+K07466+K07466+K07466+K07466+K07466+K07466
Metabolism	Lipid metabolism	Linoleic acid metabolism	9	37	0.0058135	0.0494147	ko00591	Unigene0007616;Unigene0013439;Unigene0016535;Unigene0016536;Unigene0016537;Unigene0023794;Unigene0034825;Unigene0059928;Unigene0072373	K00454+K15718+K00454+K00454+K00454+K15718+K07409+K00454+K15718
Metabolism	Lipid metabolism	Fatty acid elongation	13	67	0.00812088	0.0644257	ko00062	Unigene0012705;Unigene0013336;Unigene0021971;Unigene0021972;Unigene0028474;Unigene0031453;Unigene0032812;Unigene0035838;Unigene0036968;Unigene0037295;Unigene0037316;Unigene0039633;Unigene0076866	K15397+K15397+K15397+K15397+K15397+K15397+K10251+K15397+K15397+K15397+K15397+K10258+K15397
Genetic Information Processing	Replication and repair	Nucleotide excision repair	25	163	0.00872769	0.0649122	ko03420	Unigene0001908;Unigene0002194;Unigene0004159;Unigene0004655;Unigene0006634;Unigene0008596;Unigene0009301;Unigene0013560;Unigene0013781;Unigene0024616;Unigene0032366;Unigene0032367;Unigene0035121;Unigene0036400;Unigene0036401;Unigene0050003;Unigene0050324;Unigene0053588;Unigene0055030;Unigene0057254;Unigene0057314;Unigene0060051;Unigene0060052;Unigene0067260;Unigene0069265	K07466+K07466+K07466+K07466+K07466+K07466+K07466+K10140+K10848+K07466+K07466+K07466+K07466+K07466+K07466+K07466+K07466+K07466+K07466+K07466+K07466+K07466+K07466+K07466+K07466
Metabolism	Metabolism of terpenoids and polyketides	Terpenoid backbone biosynthesis	17	101	0.0116554	0.0815877	ko00900	Unigene0001329;Unigene0003842;Unigene0004072;Unigene0009247;Unigene0010831;Unigene0012290;Unigene0021141;Unigene0021757;Unigene0023924;Unigene0024321;Unigene0025725;Unigene0035073;Unigene0037992;Unigene0052255;Unigene0055659;Unigene0057757;Unigene0065012	K00919+K00626+K00787+K00919+K10960+K15891+K15892+K01662+K05356+K00021+K10960+K03527+K01662+K14066+K00021+K01641+K00021
Metabolism	Biosynthesis of other secondary metabolites	Phenylpropanoid biosynthesis	30	211	0.0126067	0.0831118	ko00940	Unigene0001263;Unigene0008408;Unigene0009702;Unigene0009908;Unigene0011571;Unigene0012506;Unigene0019549;Unigene0020005;Unigene0020006;Unigene0024251;Unigene0026657;Unigene0031691;Unigene0035837;Unigene0036149;Unigene0036992;Unigene0037409;Unigene0038093;Unigene0038135;Unigene0047532;Unigene0048182;Unigene0050069;Unigene0050663;Unigene0054136;Unigene0054137;Unigene0063477;Unigene0065546;Unigene00…	K01904+K01188+K00430+K00430+K06892+K00430+K01904+K00430+K00430+K00430+K00430+K00588+K10775+K00430+K00083+K00430+K22395+K13065+K05350+K05350+K00083+K13065+K01188+K01188+K00430+K13065+K13065+K05349+K13065+K00430
Metabolism	Carbohydrate metabolism	Amino sugar and nucleotide sugar metabolism	27	187	0.0143585	0.0831118	ko00520	Unigene0004586;Unigene0008072;Unigene0009358;Unigene0012527;Unigene0012636;Unigene0014981;Unigene0016121;Unigene0023143;Unigene0027219;Unigene0027735;Unigene0027871;Unigene0028453;Unigene0031970;Unigene0033260;Unigene0037705;Unigene0040138;Unigene0040286;Unigene0040288;Unigene0041597;Unigene0043164;Unigene0045531;Unigene0046053;Unigene0046643;Unigene0052959;Unigene0058943;Unigene0068806;Unigene00…	K01784+K08679+K00012+K12450+K12451+K00847+K12447+K12448+K08678+K00975+K13379+K00844+K13648+K08678+K08678+K12373+K13379+K13379+K01183+K00844+K16190+K00847+K01183+K08678+K00966+K00847+K00975
Genetic Information Processing	Replication and repair	Homologous recombination	24	162	0.0151001	0.0831118	ko03440	Unigene0001908;Unigene0002194;Unigene0004159;Unigene0004655;Unigene0006634;Unigene0008596;Unigene0009301;Unigene0024616;Unigene0032366;Unigene0032367;Unigene0035121;Unigene0036400;Unigene0036401;Unigene0050003;Unigene0050324;Unigene0053588;Unigene0053972;Unigene0055030;Unigene0057254;Unigene0057314;Unigene0060051;Unigene0060052;Unigene0067260;Unigene0069265	K07466+K07466+K07466+K07466+K07466+K07466+K07466+K07466+K07466+K07466+K07466+K07466+K07466+K07466+K07466+K07466+K10865+K07466+K07466+K07466+K07466+K07466+K07466+K07466
Metabolism	Carbohydrate metabolism	Galactose metabolism	14	80	0.0151715	0.0831118	ko00052	Unigene0004586;Unigene0005111;Unigene0007240;Unigene0016121;Unigene0018249;Unigene0025085;Unigene0026430;Unigene0028453;Unigene0035795;Unigene0040322;Unigene0042581;Unigene0043164;Unigene0047764;Unigene0050850	K01784+K01193+K01193+K12447+K01785+K01193+K01193+K00844+K01193+K01193+K01193+K00844+K01193+K00850
Metabolism	Global and overview maps	Biosynthesis of secondary metabolites	204	1917	0.0153652	0.0831118	ko01110	Unigene0000256;Unigene0000264;Unigene0000628;Unigene0000784;Unigene0001165;Unigene0001263;Unigene0001295;Unigene0001329;Unigene0002516;Unigene0003842;Unigene0004072;Unigene0004985;Unigene0005193;Unigene0005617;Unigene0005756;Unigene0006007;Unigene0006545;Unigene0007223;Unigene0007296;Unigene0007616;Unigene0007635;Unigene0007893;Unigene0008118;Unigene0008135;Unigene0008408;Unigene0008565;Unigene00…	K01681+K01850+K01623+K12657+K01610+K01904+K14760+K00919+K21371+K00626+K00787+K01807+K10527+K01648+K01568+K01057+K00121+K01723+K21026+K00454+K05933+K00121+K21373+K00511+K01188+K12657+K14423+K00919+K00430+K01057+K01792+K00430+K00121+K01568+K10960+K06892+K00873+K00873+K00430+K15397+K00134+K01115+K15397+K01115+K01115+K07385+K00454+K00454+K00454+K07385+K01803+K01785+K01904+K00430+K00430+K10206+K04120+…
Metabolism	Metabolism of cofactors and vitamins	Riboflavin metabolism	7	30	0.018103	0.0936635	ko00740	Unigene0015359;Unigene0017367;Unigene0017368;Unigene0023894;Unigene0042023;Unigene0046832;Unigene0052123	K14379+K18453+K18453+K14379+K01513+K20884+K20884
Metabolism	Energy metabolism	Nitrogen metabolism	11	60	0.0214191	0.106203	ko00910	Unigene0000911;Unigene0002155;Unigene0006799;Unigene0020605;Unigene0021289;Unigene0026333;Unigene0030918;Unigene0041691;Unigene0042631;Unigene0047662;Unigene0070919	K00261+K01674+K01674+K01674+K01674+K01673+K01674+K02575+K00264+K01674+K01673
Metabolism	Biosynthesis of other secondary metabolites	Flavonoid biosynthesis	11	61	0.0240088	0.114282	ko00941	Unigene0027549;Unigene0031691;Unigene0032605;Unigene0038135;Unigene0050663;Unigene0057116;Unigene0065546;Unigene0068124;Unigene0069600;Unigene0071316;Unigene0076314	K01859+K00588+K00660+K13065+K13065+K05278+K13065+K13065+K13065+K00660+K00475
Metabolism	Metabolism of terpenoids and polyketides	Sesquiterpenoid and triterpenoid biosynthesis	7	35	0.0398898	0.182573	ko00909	Unigene0008135;Unigene0012290;Unigene0029985;Unigene0034218;Unigene0047850;Unigene0048685;Unigene0076830	K00511+K15891+K20561+K15803+K00801+K00511+K15803
Metabolism	Carbohydrate metabolism	Fructose and mannose metabolism	15	102	0.0505212	0.222667	ko00051	Unigene0000628;Unigene0014981;Unigene0017946;Unigene0020161;Unigene0024967;Unigene0028453;Unigene0030251;Unigene0041061;Unigene0043164;Unigene0046053;Unigene0050850;Unigene0052641;Unigene0058943;Unigene0068806;Unigene0074878	K01623+K00847+K01803+K19355+K00895+K00844+K19355+K00895+K00844+K00847+K00850+K01218+K00966+K00847+K00895
Metabolism	Lipid metabolism	Steroid biosynthesis	8	45	0.0540012	0.229505	ko00100	Unigene0008135;Unigene0008711;Unigene0033225;Unigene0035875;Unigene0037394;Unigene0047850;Unigene0048685;Unigene0058765	K00511+K14423+K01853+K07748+K07748+K00801+K00511+K08242
Metabolism	Glycan biosynthesis and metabolism	Other types of O-glycan biosynthesis	5	23	0.0570451	0.234081	ko00514	Unigene0000646;Unigene0032080;Unigene0040609;Unigene0043526;Unigene0045464	K09667+K13667+K20782+K13667+K13667
Genetic Information Processing	Folding, sorting and degradation	SNARE interactions in vesicular transport	10	62	0.0595777	0.236325	ko04130	Unigene0015797;Unigene0020959;Unigene0021989;Unigene0021990;Unigene0022987;Unigene0028097;Unigene0031655;Unigene0032291;Unigene0037477;Unigene0067807	K08498+K08515+K08507+K08507+K08486+K08486+K08515+K08506+K08516+K08489
Cellular Processes	Transport and catabolism	Phagosome	24	187	0.0665783	0.255575	ko04145	Unigene0003427;Unigene0008584;Unigene0011719;Unigene0018632;Unigene0019736;Unigene0024620;Unigene0026417;Unigene0027079;Unigene0027261;Unigene0028533;Unigene0028952;Unigene0029820;Unigene0029822;Unigene0031023;Unigene0044724;Unigene0044858;Unigene0045006;Unigene0045312;Unigene0047770;Unigene0054242;Unigene0060769;Unigene0062588;Unigene0068733;Unigene0074325	K02145+K02146+K07375+K02149+K07897+K07375+K07374+K07374+K02152+K02152+K04392+K02154+K02154+K02150+K02154+K08054+K07375+K00921+K04392+K08054+K04392+K07897+K05692+K07375
Metabolism	Metabolism of cofactors and vitamins	Biotin metabolism	7	40	0.0741015	0.275565	ko00780	Unigene0015474;Unigene0037411;Unigene0037413;Unigene0039336;Unigene0066968;Unigene0070153;Unigene0070555	K09458+K09458+K09458+K09458+K09458+K09458+K09458
Metabolism	Energy metabolism	Carbon fixation in photosynthetic organisms	23	181	0.0778373	0.277979	ko00710	Unigene0000628;Unigene0001165;Unigene0003576;Unigene0004219;Unigene0004985;Unigene0006468;Unigene0012999;Unigene0015257;Unigene0017946;Unigene0022527;Unigene0036451;Unigene0040927;Unigene0041714;Unigene0042563;Unigene0042564;Unigene0043003;Unigene0043616;Unigene0044172;Unigene0044351;Unigene0045086;Unigene0045354;Unigene0052120;Unigene0053560	K01623+K01610+K01595+K01006+K01807+K00028+K00134+K00029+K01803+K00927+K00029+K00028+K00814+K01595+K01595+K01610+K00615+K00028+K00026+K00615+K01595+K00029+K01610
Metabolism	Carbohydrate metabolism	Pyruvate metabolism	25	200	0.0794226	0.277979	ko00620	Unigene0001165;Unigene0003576;Unigene0003842;Unigene0004219;Unigene0006468;Unigene0011962;Unigene0011963;Unigene0015257;Unigene0023555;Unigene0026033;Unigene0033077;Unigene0036451;Unigene0040421;Unigene0040813;Unigene0040824;Unigene0040927;Unigene0042563;Unigene0042564;Unigene0043003;Unigene0044172;Unigene0044351;Unigene0045354;Unigene0052120;Unigene0053560;Unigene0054582	K01610+K01595+K00626+K01006+K00028+K00873+K00873+K00029+K00128+K02160+K01759+K00029+K00873+K00162+K01638+K00028+K01595+K01595+K01610+K00028+K00026+K01595+K00029+K01610+K00627
Metabolism	Glycan biosynthesis and metabolism	Glycosaminoglycan degradation	5	28	0.113983	0.387542	ko00531	Unigene0004222;Unigene0038086;Unigene0040138;Unigene0044497;Unigene0051891	K01205+K07964+K12373+K07964+K07964
Environmental Information Processing	Membrane transport	ABC transporters	10	72	0.130486	0.425843	ko02010	Unigene0000217;Unigene0004901;Unigene0014092;Unigene0015903;Unigene0027561;Unigene0028091;Unigene0044161;Unigene0044280;Unigene0056572;Unigene0056680	K05666+K05658+K05658+K05658+K05665+K05658+K05681+K05658+K05658+K05658
Metabolism	Biosynthesis of other secondary metabolites	Stilbenoid, diarylheptanoid and gingerol biosynthesis	7	46	0.132405	0.425843	ko00945	Unigene0031691;Unigene0032618;Unigene0038135;Unigene0050663;Unigene0065546;Unigene0068124;Unigene0069600	K00588+K16040+K13065+K13065+K13065+K13065+K13065
Metabolism	Lipid metabolism	Fatty acid biosynthesis	12	91	0.138602	0.434045	ko00061	Unigene0015474;Unigene0026033;Unigene0026818;Unigene0037411;Unigene0037413;Unigene0038836;Unigene0039336;Unigene0043870;Unigene0043872;Unigene0066968;Unigene0070153;Unigene0070555	K09458+K02160+K01897+K09458+K09458+K01897+K09458+K01897+K01897+K09458+K09458+K09458
Metabolism	Carbohydrate metabolism	Glycolysis / Gluconeogenesis	31	275	0.153619	0.468735	ko00010	Unigene0000628;Unigene0001165;Unigene0005756;Unigene0006545;Unigene0007893;Unigene0009863;Unigene0009926;Unigene0009975;Unigene0011962;Unigene0011963;Unigene0012999;Unigene0017946;Unigene0018249;Unigene0022527;Unigene0023555;Unigene0024967;Unigene0028453;Unigene0028505;Unigene0031135;Unigene0039442;Unigene0040421;Unigene0040813;Unigene0041061;Unigene0043003;Unigene0043164;Unigene0044500;Unigene00…	K01623+K01610+K01568+K00121+K00121+K01792+K00121+K01568+K00873+K00873+K00134+K01803+K01785+K00927+K00128+K00895+K00844+K01568+K18857+K01792+K00873+K00162+K00895+K01610+K00844+K01689+K00850+K01610+K01568+K00627+K00895
Metabolism	Glycan biosynthesis and metabolism	Other glycan degradation	5	32	0.17323	0.509463	ko00511	Unigene0002259;Unigene0007645;Unigene0014721;Unigene0040138;Unigene0076369	K01191+K15923+K01206+K12373+K01191
Metabolism	Metabolism of terpenoids and polyketides	Diterpenoid biosynthesis	6	41	0.178751	0.509463	ko00904	Unigene0021156;Unigene0031828;Unigene0032021;Unigene0048739;Unigene0064763;Unigene0067840	K04120+K05282+K05282+K17961+K04124+K04120
Metabolism	Amino acid metabolism	Tryptophan metabolism	9	68	0.17981	0.509463	ko00380	Unigene0003842;Unigene0008144;Unigene0021099;Unigene0023222;Unigene0023555;Unigene0025956;Unigene0034825;Unigene0042647;Unigene0057359	K00626+K11816+K11816+K01593+K00128+K11816+K07409+K16903+K00164
Metabolism	Carbohydrate metabolism	Ascorbate and aldarate metabolism	11	88	0.19496	0.539541	ko00053	Unigene0009358;Unigene0013231;Unigene0016121;Unigene0018838;Unigene0018839;Unigene0023555;Unigene0024966;Unigene0038977;Unigene0045531;Unigene0053047;Unigene0066918	K00012+K00423+K12447+K08232+K08232+K00128+K00434+K21888+K16190+K21888+K08232
Metabolism	Lipid metabolism	Synthesis and degradation of ketone bodies	2	9	0.202156	0.54674	ko00072	Unigene0003842;Unigene0057757	K00626+K01641
Metabolism	Lipid metabolism	Fatty acid degradation	13	112	0.243478	0.643864	ko00071	Unigene0003842;Unigene0004785;Unigene0005193;Unigene0006545;Unigene0007893;Unigene0009926;Unigene0023555;Unigene0024441;Unigene0026818;Unigene0031135;Unigene0038836;Unigene0043870;Unigene0043872	K00626+K15401+K10527+K00121+K00121+K00121+K00128+K07517+K01897+K18857+K01897+K01897+K01897
Metabolism	Biosynthesis of other secondary metabolites	Caffeine metabolism	1	4	0.324126	0.807621	ko00232	Unigene0034825	K07409
Metabolism	Lipid metabolism	Arachidonic acid metabolism	5	41	0.334903	0.807621	ko00590	Unigene0005347;Unigene0027424;Unigene0027425;Unigene0028734;Unigene0054473	K00432+K00432+K00432+K00079+K18592
Metabolism	Amino acid metabolism	Lysine biosynthesis	3	22	0.337913	0.807621	ko00300	Unigene0020969;Unigene0038154;Unigene0051432	K10206+K10206+K12524
Genetic Information Processing	Translation	Aminoacyl-tRNA biosynthesis	22	213	0.339071	0.807621	ko00970	Unigene0002402;Unigene0008063;Unigene0010116;Unigene0012842;Unigene0016091;Unigene0016271;Unigene0019492;Unigene0024871;Unigene0024872;Unigene0028996;Unigene0030014;Unigene0037994;Unigene0038266;Unigene0039923;Unigene0040580;Unigene0046034;Unigene0054173;Unigene0056507;Unigene0059260;Unigene0065620;Unigene0076469;Unigene0076471	K01887+K01887+K01880+K01887+K01893+K01887+K01887+K01887+K01887+K01893+K01873+K01887+K01886+K22503+K01887+K01873+K01872+K01887+K01886+K01887+K01887+K01887
Metabolism	Lipid metabolism	alpha-Linolenic acid metabolism	8	71	0.342071	0.807621	ko00592	Unigene0005193;Unigene0007223;Unigene0007616;Unigene0016535;Unigene0016536;Unigene0016537;Unigene0031135;Unigene0059928	K10527+K01723+K00454+K00454+K00454+K00454+K18857+K00454
Metabolism	Global and overview maps	Fatty acid metabolism	17	163	0.350842	0.807621	ko01212	Unigene0003842;Unigene0005193;Unigene0015031;Unigene0015474;Unigene0026033;Unigene0026818;Unigene0032812;Unigene0037411;Unigene0037413;Unigene0038836;Unigene0039336;Unigene0039633;Unigene0043870;Unigene0043872;Unigene0066968;Unigene0070153;Unigene0070555	K00626+K10527+K10256+K09458+K02160+K01897+K10251+K09458+K09458+K01897+K09458+K10258+K01897+K01897+K09458+K09458+K09458
Metabolism	Amino acid metabolism	Arginine and proline metabolism	11	102	0.35291	0.807621	ko00330	Unigene0000784;Unigene0008565;Unigene0009478;Unigene0023555;Unigene0031725;Unigene0036566;Unigene0037404;Unigene0038319;Unigene0041298;Unigene0043051;Unigene0043230	K12657+K12657+K13366+K00128+K00294+K01611+K00472+K00318+K00472+K00318+K01583
Metabolism	Biosynthesis of other secondary metabolites	Indole alkaloid biosynthesis	3	23	0.364397	0.818174	ko00901	Unigene0007296;Unigene0023222;Unigene0042392	K21026+K01593+K21026
Metabolism	Glycan biosynthesis and metabolism	Glycosphingolipid biosynthesis - ganglio series	1	5	0.387199	0.853271	ko00604	Unigene0040138	K12373
Genetic Information Processing	Folding, sorting and degradation	Ubiquitin mediated proteolysis	26	267	0.438872	0.949558	ko04120	Unigene0010061;Unigene0013560;Unigene0014963;Unigene0023572;Unigene0023965;Unigene0024172;Unigene0024173;Unigene0024319;Unigene0026559;Unigene0027494;Unigene0027974;Unigene0029091;Unigene0029527;Unigene0031045;Unigene0031046;Unigene0033215;Unigene0036032;Unigene0039851;Unigene0041042;Unigene0042429;Unigene0044463;Unigene0046935;Unigene0056870;Unigene0057719;Unigene0062739;Unigene0067116	K03364+K10140+K10581+K03363+K10581+K10576+K10576+K04506+K04506+K10577+K04506+K10581+K10581+K04706+K04706+K04506+K10581+K10581+K10581+K10592+K10581+K10581+K10144+K10688+K10592+K09561
Metabolism	Metabolism of cofactors and vitamins	Vitamin B6 metabolism	2	16	0.447832	0.951642	ko00750	Unigene0008951;Unigene0033078	K13248+K13248
Metabolism	Amino acid metabolism	Tyrosine metabolism	8	79	0.458904	0.958062	ko00350	Unigene0006545;Unigene0007893;Unigene0009926;Unigene0010077;Unigene0023222;Unigene0031135;Unigene0040252;Unigene0041232	K00121+K00121+K00121+K00457+K01593+K18857+K00422+K00422
Environmental Information Processing	Signal transduction	Plant hormone signal transduction	39	413	0.493123	0.991642	ko04075	Unigene0005033;Unigene0011751;Unigene0013967;Unigene0015408;Unigene0017690;Unigene0019227;Unigene0020050;Unigene0020817;Unigene0025438;Unigene0026572;Unigene0026755;Unigene0027731;Unigene0028693;Unigene0030468;Unigene0030469;Unigene0030720;Unigene0031137;Unigene0031319;Unigene0032363;Unigene0032645;Unigene0033132;Unigene0033271;Unigene0033497;Unigene0033691;Unigene0035606;Unigene0039501;Unigene00…	K14488+K14488+K14488+K13449+K14488+K14488+K13449+K13449+K14496+K13464+K14487+K14484+K13449+K13464+K13464+K14488+K14484+K14487+K13464+K14496+K14484+K13946+K14496+K13463+K13464+K14487+K14488+K14509+K14513+K14487+K14487+K14487+K14487+K13463+K14504+K14492+K14488+K14486+K14486
Metabolism	Biosynthesis of other secondary metabolites	Betalain biosynthesis	1	7	0.496252	0.991642	ko00965	Unigene0023222	K01593
Metabolism	Carbohydrate metabolism	Pentose phosphate pathway	11	114	0.499987	0.991642	ko00030	Unigene0000628;Unigene0004985;Unigene0006007;Unigene0009762;Unigene0024967;Unigene0038859;Unigene0041061;Unigene0043616;Unigene0045086;Unigene0050850;Unigene0074878	K01623+K01807+K01057+K01057+K00895+K00036+K00895+K00615+K00615+K00850+K00895
Genetic Information Processing	Replication and repair	Non-homologous end-joining	2	19	0.540496	1	ko03450	Unigene0046713;Unigene0053972	K04799+K10865
Metabolism	Amino acid metabolism	Lysine degradation	7	74	0.542917	1	ko00310	Unigene0003842;Unigene0013597;Unigene0013598;Unigene0017214;Unigene0017215;Unigene0023555;Unigene0057359	K00626+K11430+K11430+K11430+K11430+K00128+K00164
Metabolism	Metabolism of cofactors and vitamins	Thiamine metabolism	4	42	0.559682	1	ko00730	Unigene0021757;Unigene0037992;Unigene0054655;Unigene0056265	K01662+K01662+K00939+K00939
Metabolism	Glycan biosynthesis and metabolism	Glycosphingolipid biosynthesis - globo and isoglobo series	1	9	0.585918	1	ko00603	Unigene0040138	K12373
Genetic Information Processing	Folding, sorting and degradation	Proteasome	10	113	0.617643	1	ko03050	Unigene0002437;Unigene0008368;Unigene0021104;Unigene0024100;Unigene0025105;Unigene0025532;Unigene0030183;Unigene0031332;Unigene0036869;Unigene0075849	K03029+K03029+K03032+K03029+K03029+K03029+K03029+K03029+K03029+K02730
Metabolism	Metabolism of cofactors and vitamins	Ubiquinone and other terpenoid-quinone biosynthesis	5	59	0.655277	1	ko00130	Unigene0001263;Unigene0001295;Unigene0010077;Unigene0019549;Unigene0023375	K01904+K14760+K00457+K01904+K03809
Metabolism	Metabolism of other amino acids	Cyanoamino acid metabolism	7	83	0.666298	1	ko00460	Unigene0008408;Unigene0047532;Unigene0048182;Unigene0054136;Unigene0054137;Unigene0054473;Unigene0068354	K01188+K05350+K05350+K01188+K01188+K18592+K05349
Metabolism	Metabolism of cofactors and vitamins	Nicotinate and nicotinamide metabolism	3	37	0.68401	1	ko00760	Unigene0035644;Unigene0042023;Unigene0043899	K18551+K01513+K03787
Organismal Systems	Environmental adaptation	Circadian rhythm - plant	5	62	0.698309	1	ko04712	Unigene0023115;Unigene0023118;Unigene0025340;Unigene0032605;Unigene0071316	K12125+K12125+K12127+K00660+K00660
Metabolism	Biosynthesis of other secondary metabolites	Isoquinoline alkaloid biosynthesis	3	39	0.718422	1	ko00950	Unigene0023222;Unigene0040252;Unigene0041232	K01593+K00422+K00422
Metabolism	Metabolism of other amino acids	Glutathione metabolism	14	169	0.719655	1	ko00480	Unigene0005347;Unigene0013692;Unigene0024966;Unigene0025517;Unigene0027424;Unigene0027425;Unigene0032757;Unigene0038859;Unigene0038977;Unigene0040233;Unigene0041602;Unigene0048750;Unigene0053047;Unigene0054473	K00432+K00799+K00434+K10808+K00432+K00432+K00799+K00036+K21888+K22596+K00383+K10808+K21888+K18592
Metabolism	Biosynthesis of other secondary metabolites	Monobactam biosynthesis	1	14	0.746381	1	ko00261	Unigene0051432	K12524
Metabolism	Amino acid metabolism	Phenylalanine metabolism	6	78	0.747354	1	ko00360	Unigene0001263;Unigene0010077;Unigene0019549;Unigene0023222;Unigene0031691;Unigene0035837	K01904+K00457+K01904+K01593+K00588+K10775
Metabolism	Metabolism of terpenoids and polyketides	Monoterpenoid biosynthesis	3	42	0.764481	1	ko00902	Unigene0014565;Unigene0017020;Unigene0075453	K07385+K07385+K07385
Metabolism	Carbohydrate metabolism	Butanoate metabolism	2	30	0.783955	1	ko00650	Unigene0003842;Unigene0057757	K00626+K01641
Metabolism	Global and overview maps	Carbon metabolism	48	570	0.799148	1	ko01200	Unigene0000256;Unigene0000628;Unigene0000911;Unigene0001165;Unigene0003576;Unigene0003842;Unigene0004219;Unigene0004985;Unigene0006007;Unigene0006468;Unigene0006545;Unigene0007893;Unigene0009762;Unigene0009926;Unigene0011962;Unigene0011963;Unigene0012999;Unigene0015257;Unigene0017946;Unigene0022527;Unigene0026033;Unigene0028453;Unigene0036451;Unigene0038859;Unigene0040336;Unigene0040421;Unigene00…	K01681+K01623+K00261+K01610+K01595+K00626+K01006+K01807+K01057+K00028+K00121+K00121+K01057+K00121+K00873+K00873+K00134+K00029+K01803+K00927+K02160+K00844+K00029+K00036+K00281+K00873+K00162+K01638+K00028+K00814+K01595+K01595+K01610+K00844+K00615+K00058+K00028+K00026+K01689+K00615+K01595+K00850+K00029+K01610+K00627+K00164+K00281+K00281
Metabolism	Metabolism of terpenoids and polyketides	Carotenoid biosynthesis	3	46	0.816155	1	ko00906	Unigene0045694;Unigene0056012;Unigene0066617	K06444+K09842+K09843
Metabolism	Amino acid metabolism	Alanine, aspartate and glutamate metabolism	6	86	0.825356	1	ko00250	Unigene0000911;Unigene0031725;Unigene0041714;Unigene0042631;Unigene0043362;Unigene0050315	K00261+K00294+K00814+K00264+K01953+K01953
Metabolism	Metabolism of cofactors and vitamins	Folate biosynthesis	2	33	0.826909	1	ko00790	Unigene0007540;Unigene0028734	K01113+K00079
Metabolism	Metabolism of other amino acids	Taurine and hypotaurine metabolism	1	18	0.828695	1	ko00430	Unigene0054473	K18592
Metabolism	Metabolism of cofactors and vitamins	Pantothenate and CoA biosynthesis	2	34	0.839422	1	ko00770	Unigene0034904;Unigene0042023	K01918+K01513
Environmental Information Processing	Signal transduction	MAPK signaling pathway - plant	17	230	0.874737	1	ko04016	Unigene0015408;Unigene0020050;Unigene0020817;Unigene0025438;Unigene0028693;Unigene0032645;Unigene0033497;Unigene0034684;Unigene0036689;Unigene0038994;Unigene0039346;Unigene0042042;Unigene0050102;Unigene0051147;Unigene0056597;Unigene0057665;Unigene0076160	K13449+K13449+K13449+K14496+K13449+K14496+K14496+K00940+K20718+K20538+K20717+K14509+K20537+K14513+K17686+K13447+K13447
Metabolism	Metabolism of terpenoids and polyketides	Brassinosteroid biosynthesis	1	22	0.884315	1	ko00905	Unigene0035442	K15639
Metabolism	Energy metabolism	Oxidative phosphorylation	21	285	0.899352	1	ko00190	Unigene0003427;Unigene0006883;Unigene0008584;Unigene0009766;Unigene0018632;Unigene0021941;Unigene0027261;Unigene0028122;Unigene0028533;Unigene0029820;Unigene0029822;Unigene0031023;Unigene0043716;Unigene0043717;Unigene0044724;Unigene0045182;Unigene0045591;Unigene0054842;Unigene0054844;Unigene0063120;Unigene0067009	K02145+K05575+K02146+K00416+K02149+K01507+K02152+K01535+K02152+K02154+K02154+K02150+K01535+K01535+K02154+K01507+K05575+K01507+K01507+K00419+K00412
Metabolism	Glycan biosynthesis and metabolism	N-Glycan biosynthesis	3	59	0.92269	1	ko00510	Unigene0013278;Unigene0035696;Unigene0054802	K12669+K00737+K05546
Genetic Information Processing	Transcription	Basal transcription factors	5	88	0.922946	1	ko03022	Unigene0005413;Unigene0008221;Unigene0037280;Unigene0045882;Unigene0062057	K03131+K03135+K03136+K03138+K14651
Metabolism	Metabolism of cofactors and vitamins	Porphyrin and chlorophyll metabolism	5	89	0.927338	1	ko00860	Unigene0010831;Unigene0025725;Unigene0044995;Unigene0054263;Unigene0066783	K10960+K10960+K01772+K02492+K13606
Metabolism	Glycan biosynthesis and metabolism	Glycosylphosphatidylinositol(GPI)-anchor biosynthesis	1	29	0.941827	1	ko00563	Unigene0037419	K05284
Metabolism	Nucleotide metabolism	Pyrimidine metabolism	14	214	0.943938	1	ko00240	Unigene0000055;Unigene0008219;Unigene0009388;Unigene0010805;Unigene0015274;Unigene0025517;Unigene0026201;Unigene0034684;Unigene0042023;Unigene0043899;Unigene0045356;Unigene0048750;Unigene0059474;Unigene0075358	K03006+K00876+K09903+K03006+K16904+K10808+K16329+K00940+K01513+K03787+K03010+K10808+K03013+K00876
Metabolism	Amino acid metabolism	Histidine metabolism	1	32	0.956679	1	ko00340	Unigene0023555	K00128
Metabolism	Carbohydrate metabolism	Citrate cycle (TCA cycle)	9	155	0.959325	1	ko00020	Unigene0000256;Unigene0001165;Unigene0005617;Unigene0040813;Unigene0043003;Unigene0044351;Unigene0053560;Unigene0054582;Unigene0057359	K01681+K01610+K01648+K00162+K01610+K00026+K01610+K00627+K00164
Metabolism	Amino acid metabolism	Valine, leucine and isoleucine degradation	4	84	0.960409	1	ko00280	Unigene0003842;Unigene0023555;Unigene0042782;Unigene0057757	K00626+K00128+K00020+K01641
Metabolism	Metabolism of other amino acids	Selenocompound metabolism	1	33	0.960734	1	ko00450	Unigene0038627	K01761
Metabolism	Metabolism of terpenoids and polyketides	Zeatin biosynthesis	1	33	0.960734	1	ko00908	Unigene0060566	K13495
Metabolism	Lipid metabolism	Biosynthesis of unsaturated fatty acids	3	69	0.96221	1	ko01040	Unigene0015031;Unigene0032812;Unigene0039633	K10256+K10251+K10258
Genetic Information Processing	Translation	mRNA surveillance pathway	14	224	0.963524	1	ko03015	Unigene0002104;Unigene0003596;Unigene0008712;Unigene0009795;Unigene0013745;Unigene0016399;Unigene0027510;Unigene0036639;Unigene0037937;Unigene0044441;Unigene0044998;Unigene0048639;Unigene0048641;Unigene0048924	K03267+K14404+K14396+K14411+K11584+K14411+K11583+K14400+K13126+K14962+K06269+K13171+K13171+K14411
Cellular Processes	Transport and catabolism	Peroxisome	9	161	0.970208	1	ko04146	Unigene0004824;Unigene0007336;Unigene0026818;Unigene0028703;Unigene0030068;Unigene0038836;Unigene0043870;Unigene0043872;Unigene0069829	K13356+K13348+K01897+K13348+K13348+K01897+K01897+K01897+K13344
Metabolism	Metabolism of other amino acids	beta-Alanine metabolism	3	73	0.971886	1	ko00410	Unigene0009478;Unigene0023555;Unigene0034904	K13366+K00128+K01918
Metabolism	Amino acid metabolism	Arginine biosynthesis	2	56	0.972243	1	ko00220	Unigene0000911;Unigene0041714	K00261+K00814
Metabolism	Amino acid metabolism	Glycine, serine and threonine metabolism	7	136	0.975208	1	ko00260	Unigene0023239;Unigene0040336;Unigene0043896;Unigene0043959;Unigene0051432;Unigene0057797;Unigene0057798	K00108+K00281+K01696+K00058+K12524+K00281+K00281
Metabolism	Carbohydrate metabolism	Propanoate metabolism	2	59	0.978398	1	ko00640	Unigene0003842;Unigene0026033	K00626+K02160
Metabolism	Amino acid metabolism	Phenylalanine, tyrosine and tryptophan biosynthesis	4	93	0.978612	1	ko00400	Unigene0000264;Unigene0033904;Unigene0043896;Unigene0046283	K01850+K00766+K01696+K05359
Metabolism	Amino acid metabolism	Cysteine and methionine metabolism	9	168	0.979529	1	ko00270	Unigene0007635;Unigene0035424;Unigene0036566;Unigene0038627;Unigene0043276;Unigene0044351;Unigene0051432;Unigene0053372;Unigene0074535	K05933+K00558+K01611+K01761+K00789+K00026+K12524+K05933+K00558
Genetic Information Processing	Transcription	RNA polymerase	4	94	0.980056	1	ko03020	Unigene0000055;Unigene0010805;Unigene0045356;Unigene0059474	K03006+K03006+K03010+K03013
Metabolism	Lipid metabolism	Sphingolipid metabolism	1	44	0.986691	1	ko00600	Unigene0013932	K04708
Cellular Processes	Transport and catabolism	Autophagy - other eukaryotes	3	83	0.986842	1	ko04136	Unigene0003538;Unigene0051250;Unigene0053701	K17890+K17906+K07204
Genetic Information Processing	Folding, sorting and degradation	Protein processing in endoplasmic reticulum	30	461	0.98964	1	ko04141	Unigene0000832;Unigene0001804;Unigene0002673;Unigene0003567;Unigene0013278;Unigene0013526;Unigene0016302;Unigene0019415;Unigene0020820;Unigene0022154;Unigene0022418;Unigene0025626;Unigene0025903;Unigene0026476;Unigene0032137;Unigene0042681;Unigene0042814;Unigene0043846;Unigene0044858;Unigene0045097;Unigene0047725;Unigene0053674;Unigene0054092;Unigene0054093;Unigene0054242;Unigene0054802;Unigene00…	K03283+K13993+K03283+K04523+K12669+K09518+K09580+K14006+K09580+K10666+K14016+K14009+K09518+K10666+K03283+K13993+K04079+K14006+K08054+K10950+K09518+K03283+K03283+K03283+K08054+K05546+K03283+K04523+K09561+K03283
Metabolism	Nucleotide metabolism	Purine metabolism	16	286	0.992931	1	ko00230	Unigene0000055;Unigene0010805;Unigene0011962;Unigene0011963;Unigene0017367;Unigene0017368;Unigene0025517;Unigene0034684;Unigene0040421;Unigene0042023;Unigene0043899;Unigene0045356;Unigene0048750;Unigene0054655;Unigene0056265;Unigene0059474	K03006+K03006+K00873+K00873+K18453+K18453+K10808+K00940+K00873+K01513+K03787+K03010+K10808+K00939+K00939+K03013
Metabolism	Energy metabolism	Photosynthesis - antenna proteins	1	51	0.993319	1	ko00196	Unigene0073225	K08912
Genetic Information Processing	Replication and repair	Base excision repair	2	73	0.993456	1	ko03410	Unigene0031122;Unigene0046713	K01246+K04799
Genetic Information Processing	Translation	RNA transport	18	322	0.99535	1	ko03013	Unigene0000054;Unigene0006396;Unigene0017763;Unigene0020846;Unigene0024352;Unigene0027494;Unigene0030817;Unigene0037937;Unigene0038389;Unigene0043519;Unigene0048639;Unigene0048641;Unigene0052339;Unigene0052346;Unigene0052831;Unigene0054355;Unigene0054360;Unigene0070970	K14288+K03113+K14298+K02516+K13137+K10577+K13137+K13126+K14300+K14319+K13171+K13171+K03252+K03252+K03252+K03259+K03259+K14293
Metabolism	Carbohydrate metabolism	Glyoxylate and dicarboxylate metabolism	7	164	0.995591	1	ko00630	Unigene0000256;Unigene0003842;Unigene0040336;Unigene0040824;Unigene0044351;Unigene0057797;Unigene0057798	K01681+K00626+K00281+K01638+K00026+K00281+K00281
Genetic Information Processing	Translation	Ribosome biogenesis in eukaryotes	7	168	0.996603	1	ko03008	Unigene0013557;Unigene0035359;Unigene0042604;Unigene0050904;Unigene0058011;Unigene0072461;Unigene0077372	K14521+K14571+K14564+K14574+K14544+K14521+K14572
Metabolism	Global and overview maps	Biosynthesis of amino acids	26	444	0.997579	1	ko01230	Unigene0000256;Unigene0000264;Unigene0000628;Unigene0000784;Unigene0004985;Unigene0008565;Unigene0011962;Unigene0011963;Unigene0012999;Unigene0017946;Unigene0020969;Unigene0022527;Unigene0033904;Unigene0038154;Unigene0040421;Unigene0041714;Unigene0042631;Unigene0043276;Unigene0043616;Unigene0043896;Unigene0043959;Unigene0044500;Unigene0045086;Unigene0046283;Unigene0050850;Unigene0051432	K01681+K01850+K01623+K12657+K01807+K12657+K00873+K00873+K00134+K01803+K10206+K00927+K00766+K10206+K00873+K00814+K00264+K00789+K00615+K01696+K00058+K01689+K00615+K05359+K00850+K12524
Genetic Information Processing	Transcription	Spliceosome	22	399	0.998414	1	ko03040	Unigene0000832;Unigene0002673;Unigene0003686;Unigene0005125;Unigene0006507;Unigene0032137;Unigene0041898;Unigene0043335;Unigene0048468;Unigene0050372;Unigene0052968;Unigene0053020;Unigene0053461;Unigene0053674;Unigene0054092;Unigene0054093;Unigene0058622;Unigene0064333;Unigene0074084;Unigene0076494;Unigene0076495;Unigene0077590	K03283+K03283+K12860+K12860+K12856+K03283+K11095+K12828+K12872+K12820+K12864+K12819+K12869+K03283+K03283+K03283+K03283+K12859+K12811+K12811+K12811+K03283
Metabolism	Global and overview maps	2-Oxocarboxylic acid metabolism	2	99	0.999341	1	ko01210	Unigene0000256;Unigene0041714	K01681+K00814
Genetic Information Processing	Folding, sorting and degradation	Protein export	1	78	0.999534	1	ko03060	Unigene0046904	K03108
Genetic Information Processing	Folding, sorting and degradation	RNA degradation	6	202	0.99991	1	ko03018	Unigene0000266;Unigene0007036;Unigene0009612;Unigene0037937;Unigene0044500;Unigene0050850	K12600+K12616+K12600+K13126+K01689+K00850
Genetic Information Processing	Translation	Ribosome	9	778	1	1	ko03010	Unigene0000705;Unigene0000904;Unigene0018122;Unigene0029623;Unigene0043263;Unigene0061031;Unigene0061606;Unigene0064811;Unigene0071083	K02953+K02942+K02941+K02917+K02925+K02996+K02946+K02980+K02865
